# Supplementary material for: Allosteric drug transport mechanism of multidrug transporter AcrB
Source: Springer Nature journal article supplement (doi:10.1038/s41467-021-24151-3), 2021-06-29
Supplement: MOESM2 [file 41467_2021_24151_MOESM2_ESM.pdf]

**Editorial Note:** This manuscript has been previously reviewed at another journal that is not operating a transparent peer review scheme. The manuscript was considered suitable for publication without further review at *Nature Communications*.
