# Supplementary material for: Allosteric drug transport mechanism of multidrug transporter AcrB
Source: Nat Commun. 2021 Jun 29;12:3889. doi: 10.1038/s41467-021-24151-3 (PMC8242077; doi:10.1038/s41467-021-24151-3)
Supplement: Supplementary file 4 — Supplementary Data 1 [file 41467_2021_24151_MOESM4_ESM.xlsx]

## Sheet: a, TM7-TM8 groove
Supplementary Data 1. Drug susceptibility profiles of AcrB substitution variants. a, TM7/TM8 groove, b, TM8/PC2 tunnel, c, CH1-CH4 tunnels. Data are mean ± s.e.m. of N = ≥3–4 biologically independent cells. * represents p value = 0.005–0.05 (Student's t-test, two-sided); ** represents p value < 0.005 (Student's t-test, two-sided). Growth of the cells: red, ≤0.6 (severely affected); light red, 0.6…
Control	Chloramphenicol	Florfenicol	Thiamphenicol	Linezolid	Cloxacillin	Dicloxacillin	Oxacillin	Piperacillin	Fusidic acid	Novobiocin	Erythromycin	Doxorubicin	Rhodamine 6G	TPP+	Control
WT (positive)	1.000 ± 0.000	1.000 ± 0.000	1.000 ± 0.000	1.000 ± 0.000	1.000 ± 0.000	1.000 ± 0.000	1.000 ± 0.000	1.000 ± 0.000	1.000 ± 0.000	1.000 ± 0.000	1.000 ± 0.000	1.000 ± 0.000	1.000 ± 0.000	1.000 ± 0.000	WT (positive)
D407N (negative)	0.054 ± 0.014	0.048 ± 0.010	0.094 ± 0.018	0.019 ± 0.007	0.000 ± 0.000	0.002 ± 0.002	0.003 ± 0.003	0.005 ± 0.005	0.034 ± 0.009	0.032 ± 0.010	0.031 ± 0.009	0.022 ± 0.009	0.008 ± 0.004	0.002 ± 0.002	D407N (negative)
TM7/TM8 (CH1)	Chloramphenicol	Florfenicol	Thiamphenicol	Linezolid	Cloxacillin	Dicloxacillin	Oxacillin	Piperacillin	Fusidic acid	Novobiocin	Erythromycin	Doxorubicin	Rhodamine 6G	TPP+	TM7/TM8 (CH1)
F453A	0.327 ± 0.043 **	0.353 ± 0.115 **	0.594 ± 0.066 **	0.420 ± 0.055 **	0.300 ± 0.076 **	0.528 ± 0.109 **	0.250 ± 0.048 **	0.167 ± 0.000 **	0.900 ± 0.067	0.803 ± 0.068 *	1.000 ± 0.000	1.000 ± 0.000	1.000 ± 0.000	0.958 ± 0.042	F453A
F459A	0.720 ± 0.030 **	0.727 ± 0.026 **	0.721 ± 0.033 **	0.817 ± 0.068 *	--	1.120 ± 0.049 *	--	--	1.133 ± 0.082	1.000 ± 0.000	1.000 ± 0.000	1.000 ± 0.000	0.900 ± 0.100	1.000 ± 0.000	F459A
Y467A	1.000 ± 0.082	1.140 ± 0.098	1.090 ± 0.056	1.000 ± 0.000	0.331 ± 0.042 **	0.231 ± 0.020 **	0.450 ± 0.054 **	0.514 ± 0.096 **	0.420 ± 0.055 **	0.652 ± 0.070 **	0.175 ± 0.008 **	0.860 ± 0.064	0.871 ± 0.069	1.000 ± 0.000	Y467A
Y545A	0.875 ± 0.080	0.958 ± 0.042	1.036 ± 0.103	0.760 ± 0.098 *	0.333 ± 0.000 **	0.250 ± 0.057 **	0.313 ± 0.021 **	0.371 ± 0.053 **	0.737 ± 0.070 *	0.733 ± 0.081 *	0.900 ± 0.100	0.875 ± 0.125	0.583 ± 0.048 **	1.000 ± 0.000	Y545A
V549A	0.875 ± 0.125	1.000 ± 0.000	0.958 ± 0.042	0.880 ± 0.080	--	0.778 ± 0.134	--	--	1.010 ± 0.071	0.883 ± 0.073	0.950 ± 0.050	1.000 ± 0.000	0.917 ± 0.048	1.000 ± 0.000	V549A
M552A	0.583 ± 0.083 **	0.729 ± 0.104 *	0.675 ± 0.042 **	0.720 ± 0.120 *	--	0.806 ± 0.109	--	--	1.117 ± 0.073	0.833 ± 0.070 *	0.950 ± 0.050	1.000 ± 0.000	1.000 ± 0.000	1.067 ± 0.067	M552A
F556A	1.167 ± 0.096	0.938 ± 0.063	1.056 ± 0.056	0.947 ± 0.122	--	0.889 ± 0.119	--	--	1.107 ± 0.069	0.833 ± 0.070 *	0.950 ± 0.050	1.000 ± 0.000	0.958 ± 0.042	1.000 ± 0.000	F556A
S561A	0.750 ± 0.083 *	0.667 ± 0.118 *	0.814 ± 0.062 *	0.773 ± 0.113	--	0.833 ± 0.105	--	--	1.107 ± 0.069	0.833 ± 0.070 *	0.950 ± 0.050	1.000 ± 0.000	0.958 ± 0.042	1.000 ± 0.000	S561A
N871A	1.500 ± 0.215	1.292 ± 0.105 *	1.403 ± 0.106 **	1.133 ± 0.103	--	0.861 ± 0.117	--	--	1.040 ± 0.040	0.833 ± 0.070 *	0.950 ± 0.050	1.000 ± 0.000	0.958 ± 0.042	1.000 ± 0.000	N871A
Y877A	0.333 ± 0.000 **	0.458 ± 0.080 **	0.544 ± 0.083 **	0.547 ± 0.061 **	0.542 ± 0.125 *	0.556 ± 0.056 **	0.396 ± 0.092 **	0.413 ± 0.059 **	1.040 ± 0.040	0.783 ± 0.057 **	0.950 ± 0.050	1.000 ± 0.000	0.958 ± 0.042	1.000 ± 0.000	Y877A
S880A	1.150 ± 0.076	1.000 ± 0.000	1.000 ± 0.000	1.067 ± 0.067	--	1.067 ± 0.067	--	--	1.389 ± 0.056 **	1.167 ± 0.083	1.000 ± 0.000	1.000 ± 0.000	1.000 ± 0.000	1.000 ± 0.000	S880A
L881A	0.542 ± 0.080 **	0.521 ± 0.110 **	0.586 ± 0.061 **	0.587 ± 0.049 **	0.500 ± 0.096 **	0.417 ± 0.083 **	0.479 ± 0.086 **	0.504 ± 0.091 **	0.817 ± 0.076 *	0.783 ± 0.097	0.950 ± 0.050	1.000 ± 0.000	0.958 ± 0.042	1.000 ± 0.000	L881A
V884A	0.754 ± 0.088 *	0.783 ± 0.079 *	0.888 ± 0.066	0.738 ± 0.047 **	0.500 ± 0.053 **	0.454 ± 0.100 **	0.625 ± 0.080 **	0.517 ± 0.055 **	0.806 ± 0.080 *	0.867 ± 0.082	0.917 ± 0.083	1.000 ± 0.000	0.917 ± 0.048	0.917 ± 0.083	V884A
L888A	0.258 ± 0.028 **	0.367 ± 0.019 **	0.504 ± 0.091 **	0.263 ± 0.047 **	0.233 ± 0.031 **	0.300 ± 0.076 **	0.250 ± 0.048 **	0.300 ± 0.122 **	0.750 ± 0.083 *	0.737 ± 0.070 *	1.000 ± 0.000	0.944 ± 0.056	0.583 ± 0.048 **	0.917 ± 0.083	L888A
M902A	0.950 ± 0.050	1.050 ± 0.050	1.000 ± 0.000	0.844 ± 0.074	--	0.887 ± 0.101	--	--	0.933 ± 0.067	1.000 ± 0.000	1.000 ± 0.000	1.000 ± 0.000	0.950 ± 0.050	1.000 ± 0.000	M902A
L903A	0.517 ± 0.055 **	0.567 ± 0.158 *	0.713 ± 0.109 *	0.475 ± 0.048 **	0.500 ± 0.053 **	0.621 ± 0.102 *	0.500 ± 0.096 **	0.475 ± 0.072 **	0.889 ± 0.082	0.817 ± 0.076 *	1.000 ± 0.000	1.000 ± 0.000	0.833 ± 0.118	1.000 ± 0.000	L903A
V905A	0.567 ± 0.041 **	0.517 ± 0.113 *	0.617 ± 0.073 **	0.575 ± 0.085 **	0.550 ± 0.117 **	0.546 ± 0.088 **	0.542 ± 0.080 **	0.475 ± 0.072 **	0.986 ± 0.119	0.920 ± 0.199	0.917 ± 0.083	1.000 ± 0.000	0.958 ± 0.042	0.917 ± 0.083	V905A
N923A	1.075 ± 0.109	1.100 ± 0.058	0.925 ± 0.109	1.038 ± 0.107	--	0.925 ± 0.114	--	--	1.172 ± 0.086	0.950 ± 0.189	1.000 ± 0.000	1.000 ± 0.000	0.958 ± 0.042	1.000 ± 0.000	N923A
V925A	0.967 ± 0.087	1.000 ± 0.139	0.907 ± 0.086	1.063 ± 0.063	--	0.804 ± 0.058 **	--	--	1.023 ± 0.103	0.876 ± 0.061	1.050 ± 0.050	1.000 ± 0.000	1.000 ± 0.000	1.050 ± 0.050	V925A
F927A	1.014 ± 0.055	0.933 ± 0.041	0.842 ± 0.055 *	0.972 ± 0.059	0.592 ± 0.034 **	0.753 ± 0.090 *	0.583 ± 0.083 **	0.729 ± 0.104 *	0.972 ± 0.028	0.713 ± 0.087 *	1.000 ± 0.000	1.000 ± 0.000	0.952 ± 0.048	0.971 ± 0.029	F927A
Q928A	1.100 ± 0.058	1.167 ± 0.105	1.090 ± 0.125	1.125 ± 0.125	--	0.902 ± 0.070	--	--	1.090 ± 0.119	0.895 ± 0.068	1.050 ± 0.050	1.000 ± 0.000	1.000 ± 0.000	1.050 ± 0.050	Q928A
V929A	0.375 ± 0.091 **	0.480 ± 0.093 **	0.464 ± 0.058 **	0.556 ± 0.063 **	0.408 ± 0.034 **	0.693 ± 0.059 **	0.208 ± 0.024 **	0.375 ± 0.042 **	0.972 ± 0.028	0.793 ± 0.097	0.847 ± 0.082	1.000 ± 0.000	1.000 ± 0.000	0.948 ± 0.034	V929A
L931A	0.113 ± 0.066 **	0.150 ± 0.096 **	0.350 ± 0.061 **	0.213 ± 0.013 **	0.183 ± 0.055 **	0.392 ± 0.039 **	0.000 ± 0.000	0.133 ± 0.082 **	1.075 ± 0.103	0.910 ± 0.191	1.000 ± 0.000	1.000 ± 0.000	0.958 ± 0.042	0.958 ± 0.042	L931A
L932A	1.208 ± 0.164	1.000 ± 0.000	1.117 ± 0.083	1.033 ± 0.033	--	0.967 ± 0.033	--	--	0.972 ± 0.028	0.927 ± 0.045	1.042 ± 0.042	1.000 ± 0.000	1.000 ± 0.000	0.976 ± 0.024	L932A
I935A	0.963 ± 0.134	1.100 ± 0.058	1.050 ± 0.050	1.038 ± 0.107	--	0.867 ± 0.045 *	--	--	1.047 ± 0.111	1.067 ± 0.163	1.000 ± 0.000	1.000 ± 0.000	0.958 ± 0.042	1.000 ± 0.000	I935A

## Sheet: b, TM8-PC2 tunnel
Supplementary Data 1. Drug susceptibility profiles of AcrB substitution variants. a, TM7/TM8 groove, b, TM8/PC2 tunnel, c, CH1-CH4 tunnels. Data are mean ± s.e.m. of N = ≥3–4 biologically independent cells. * represents p value = 0.005–0.05 (Student's t-test, two-sided); ** represents p value < 0.005 (Student's t-test, two-sided). Growth of the cells: red, ≤0.6 (severely affected); light red, 0.6…
Control	Chloramphenicol	Florfenicol	Thiamphenicol	Linezolid	Cloxacillin	Dicloxacillin	Oxacillin	Piperacillin	Fusidic acid	Novobiocin	Erythromycin	Doxorubicin	Rhodamine 6G	TPP+	Control
WT (positive)	1.000 ± 0.000	1.000 ± 0.000	1.000 ± 0.000	1.000 ± 0.000	1.000 ± 0.000	1.000 ± 0.000	1.000 ± 0.000	1.000 ± 0.000	1.000 ± 0.000	1.000 ± 0.000	1.000 ± 0.000	1.000 ± 0.000	1.000 ± 0.000	1.000 ± 0.000	WT (positive)
D407N (negative)	0.054 ± 0.014	0.048 ± 0.010	0.094 ± 0.018	0.019 ± 0.007	0.000 ± 0.000	0.002 ± 0.002	0.003 ± 0.003	0.005 ± 0.005	0.034 ± 0.009	0.032 ± 0.010	0.031 ± 0.009	0.022 ± 0.009	0.008 ± 0.004	0.002 ± 0.002	D407N (negative)
TM8/PC2 (CH1)	Chloramphenicol	Florfenicol	Thiamphenicol	Linezolid	Cloxacillin	Dicloxacillin	Oxacillin	Piperacillin	Fusidic acid	Novobiocin	Erythromycin	Doxorubicin	Rhodamine 6G	TPP+	Guarding (CH1)
Q34A	0.688 ± 0.063 **	0.567 ± 0.041 **	0.671 ± 0.031 **	0.650 ± 0.061 **	--	0.817 ± 0.076 *	--	--	0.950 ± 0.050	1.042 ± 0.105	1.125 ± 0.085	1.000 ± 0.000	1.000 ± 0.000	1.000 ± 0.000	Q34A
Y35A	0.000 ± 0.000 **	0.000 ± 0.000 **	0.000 ± 0.000 **	0.000 ± 0.000 **	--	0.000 ± 0.000 **	--	--	0.113 ± 0.066 **	0.000 ± 0.000 **	0.250 ± 0.050 **	0.217 ± 0.040 **	0.000 ± 0.000 **	0.200 ± 0.000 **	Y35A
T37A	1.100 ± 0.058	1.233 ± 0.145	1.140 ± 0.098	1.125 ± 0.125	--	0.965 ± 0.058	--	--	1.090 ± 0.056	0.848 ± 0.072	1.050 ± 0.050	1.000 ± 0.000	0.975 ± 0.025	1.050 ± 0.050	T37A
I38A	0.100 ± 0.100 **	0.073 ± 0.045 **	0.157 ± 0.067 **	0.229 ± 0.040 **	0.289 ± 0.026 **	0.706 ± 0.055 **	0.056 ± 0.035 **	0.094 ± 0.043 **	1.140 ± 0.098	0.824 ± 0.085	1.050 ± 0.050	1.040 ± 0.040	0.963 ± 0.055	1.008 ± 0.075	I38A
T93A	0.683 ± 0.089 *	0.693 ± 0.053 **	0.753 ± 0.068 *	0.960 ± 0.040	--	1.033 ± 0.082	--	--	1.033 ± 0.111	1.000 ± 0.000	1.000 ± 0.000	1.008 ± 0.075	0.900 ± 0.058	1.000 ± 0.000	T93A
L393A	0.169 ± 0.063 **	0.178 ± 0.007 **	0.222 ± 0.082 **	0.067 ± 0.041 **	0.000 ± 0.000 **	0.024 ± 0.024 **	0.000 ± 0.000 **	0.000 ± 0.000 **	0.663 ± 0.053 **	0.661 ± 0.071 **	0.656 ± 0.119 *	1.000 ± 0.000	1.000 ± 0.000	0.333 ± 0.000 **	L393A
S462A	1.075 ± 0.048	1.000 ± 0.000	1.000 ± 0.000	1.100 ± 0.061	--	0.850 ± 0.067	--	--	0.983 ± 0.126	1.125 ± 0.125	0.950 ± 0.050	1.000 ± 0.000	0.900 ± 0.058	1.000 ± 0.000	S462A
T463A	1.000 ± 0.000	1.017 ± 0.052	0.939 ± 0.039	0.976 ± 0.024	--	0.681 ± 0.068 **	--	--	0.794 ± 0.069 *	0.950 ± 0.050	1.000 ± 0.000	1.067 ± 0.067	1.000 ± 0.000	1.000 ± 0.000	T463A
I466A	0.050 ± 0.050 **	0.040 ± 0.040 **	0.157 ± 0.067 **	0.042 ± 0.042 **	0.000 ± 0.000 **	0.000 ± 0.000 **	0.000 ± 0.000 **	0.000 ± 0.000 **	0.610 ± 0.086 **	0.629 ± 0.053 **	0.258 ± 0.081 **	1.000 ± 0.000	0.763 ± 0.110 *	0.083 ± 0.048 **	I466A
F470A	0.293 ± 0.092 **	0.353 ± 0.115 **	0.533 ± 0.048 **	0.493 ± 0.085 **	0.425 ± 0.101 **	0.583 ± 0.103 **	0.333 ± 0.068 **	0.375 ± 0.042 **	0.900 ± 0.067	0.803 ± 0.068 *	1.000 ± 0.000	1.000 ± 0.000	1.000 ± 0.000	1.000 ± 0.000	F470A
F563A	0.350 ± 0.107 **	0.208 ± 0.042 **	0.424 ± 0.064 **	0.500 ± 0.068 **	0.503 ± 0.058 **	0.350 ± 0.017 **	0.533 ± 0.021 **	0.547 ± 0.119 **	0.617 ± 0.073 **	0.493 ± 0.058 **	0.833 ± 0.053 *	1.000 ± 0.000	1.000 ± 0.000	1.000 ± 0.000	F563A
L564A	0.600 ± 0.066 **	0.543 ± 0.100 **	0.587 ± 0.079 **	0.910 ± 0.056	--	0.983 ± 0.100	--	--	1.033 ± 0.111	1.000 ± 0.000	1.000 ± 0.000	0.925 ± 0.092	0.950 ± 0.050	0.950 ± 0.050	L564A
D566A	1.250 ± 0.102 *	1.113 ± 0.066	1.208 ± 0.125	1.125 ± 0.072	--	1.450 ± 0.229	--	--	1.417 ± 0.129 *	1.208 ± 0.185	0.750 ± 0.101 *	1.000 ± 0.000	1.000 ± 0.000	1.000 ± 0.000	D566A
E567A	0.507 ± 0.116 **	0.560 ± 0.096 **	0.678 ± 0.051 **	0.960 ± 0.040	0.275 ± 0.055 **	0.528 ± 0.109 **	0.417 ± 0.173 *	0.333 ± 0.059 **	0.727 ± 0.037 **	0.769 ± 0.076 *	1.000 ± 0.000	1.000 ± 0.000	1.000 ± 0.000	0.958 ± 0.042	E567A
I671A	0.100 ± 0.100 **	0.123 ± 0.052 **	0.197 ± 0.084 **	0.083 ± 0.083 **	0.214 ± 0.046 **	0.580 ± 0.034 **	0.028 ± 0.028 **	0.067 ± 0.042 **	1.140 ± 0.098	0.776 ± 0.082 *	1.050 ± 0.050	0.967 ± 0.033	0.975 ± 0.025	0.775 ± 0.090 *	I671A
V672A	1.188 ± 0.120	0.888 ± 0.066	1.075 ± 0.149	1.125 ± 0.072	--	1.133 ± 0.133	--	--	1.283 ± 0.082 *	1.083 ± 0.083	1.167 ± 0.105	1.000 ± 0.000	1.000 ± 0.000	1.000 ± 0.000	V672A
E673A	0.972 ± 0.028	0.975 ± 0.068	0.814 ± 0.062 *	0.905 ± 0.046	--	1.239 ± 0.059 **	--	--	1.056 ± 0.056	1.217 ± 0.079 *	1.000 ± 0.000	1.067 ± 0.067	1.000 ± 0.000	1.000 ± 0.000	E673A
L674A	0.350 ± 0.107 **	0.208 ± 0.042 **	0.452 ± 0.081 **	0.375 ± 0.042 **	0.392 ± 0.039 **	0.617 ± 0.121 *	0.333 ± 0.068 **	0.375 ± 0.042 **	1.050 ± 0.050	0.693 ± 0.045 **	1.000 ± 0.000	1.000 ± 0.000	1.000 ± 0.000	1.000 ± 0.000	L674A
D681A	0.867 ± 0.062	0.792 ± 0.125	0.771 ± 0.052 **	0.958 ± 0.042	--	1.008 ± 0.075	--	--	0.875 ± 0.125	1.000 ± 0.089	0.533 ± 0.082 **	1.000 ± 0.000	1.000 ± 0.000	1.000 ± 0.000	D681A
N719A	0.417 ± 0.099 **	0.333 ± 0.000 **	0.524 ± 0.049 **	0.458 ± 0.042 **	0.517 ± 0.088 **	0.658 ± 0.092 *	0.333 ± 0.068 **	0.208 ± 0.042 **	1.000 ± 0.000	0.960 ± 0.117	1.000 ± 0.000	1.000 ± 0.000	1.000 ± 0.000	1.000 ± 0.000	N719A
E826A	0.367 ± 0.062 **	0.333 ± 0.068 **	0.524 ± 0.049 **	0.458 ± 0.042 **	--	0.392 ± 0.039 **	--	--	0.392 ± 0.039 **	0.493 ± 0.058 **	0.433 ± 0.100 **	1.000 ± 0.000	0.667 ± 0.175	1.000 ± 0.000	E826A
L828A	1.000 ± 0.000	0.958 ± 0.042	1.000 ± 0.044	1.000 ± 0.000	--	1.050 ± 0.050	--	--	1.050 ± 0.050	1.000 ± 0.089	1.000 ± 0.000	1.000 ± 0.000	1.000 ± 0.000	1.000 ± 0.000	L828A
M862A	0.933 ± 0.041	0.875 ± 0.125	0.895 ± 0.037 *	1.000 ± 0.000	--	1.050 ± 0.050	--	--	1.050 ± 0.050	0.920 ± 0.136	1.000 ± 0.000	1.000 ± 0.000	1.000 ± 0.000	1.000 ± 0.000	M862A
S863A	0.558 ± 0.042 **	0.679 ± 0.065 **	0.594 ± 0.079 **	0.750 ± 0.058 **	--	0.930 ± 0.109	--	--	1.047 ± 0.082	0.950 ± 0.050	1.000 ± 0.000	1.000 ± 0.000	1.000 ± 0.000	1.000 ± 0.000	S863A
Q865A	0.367 ± 0.064 **	0.429 ± 0.049 **	0.417 ± 0.087 **	0.429 ± 0.034 **	--	0.878 ± 0.081	--	--	1.000 ± 0.000	1.033 ± 0.111	1.000 ± 0.000	1.000 ± 0.000	1.000 ± 0.000	1.000 ± 0.000	Q865A
E866A	0.608 ± 0.065 **	0.854 ± 0.064 *	0.642 ± 0.098 **	0.810 ± 0.054 **	--	1.039 ± 0.090	--	--	0.944 ± 0.056	1.096 ± 0.121	1.000 ± 0.000	1.011 ± 0.106	1.000 ± 0.000	1.000 ± 0.000	E866A
S869A	1.117 ± 0.053	1.213 ± 0.120	1.000 ± 0.000	1.000 ± 0.000	--	0.928 ± 0.087	--	--	0.911 ± 0.059	1.063 ± 0.063	1.000 ± 0.000	1.067 ± 0.067	1.000 ± 0.000	1.000 ± 0.000	S869A
D924A	0.819 ± 0.087	0.827 ± 0.053 *	0.781 ± 0.066 *	0.756 ± 0.059 **	0.183 ± 0.010 **	0.173 ± 0.007 **	0.104 ± 0.063 **	0.167 ± 0.068 **	0.594 ± 0.088 **	0.590 ± 0.046 **	0.289 ± 0.113 **	0.800 ± 0.122	0.781 ± 0.101	0.948 ± 0.034	D924A
Y926A	0.861 ± 0.090	0.893 ± 0.044 *	0.781 ± 0.066 *	0.700 ± 0.033 **	0.042 ± 0.042 **	0.133 ± 0.033 **	0.000 ± 0.000 **	0.125 ± 0.042 **	0.511 ± 0.070 **	0.433 ± 0.052 **	0.475 ± 0.144 **	0.867 ± 0.097	0.567 ± 0.129 *	0.657 ± 0.073 **	Y926A
F563L	0.408 ± 0.034 **	0.308 ± 0.036 **	0.629 ± 0.053 **	0.538 ± 0.085 **	--	0.713 ± 0.038 **	--	--	0.870 ± 0.054 *	0.960 ± 0.040	0.650 ± 0.070 **	0.933 ± 0.041	1.036 ± 0.036	1.000 ± 0.000	F563L
F563W	1.146 ± 0.086	1.083 ± 0.083	1.000 ± 0.000	1.000 ± 0.000	--	1.063 ± 0.063	--	--	1.067 ± 0.067	0.960 ± 0.040	1.083 ± 0.120	1.007 ± 0.058	1.036 ± 0.036	1.000 ± 0.000	F563W
F563Y	1.179 ± 0.187	1.146 ± 0.086	1.208 ± 0.072 *	1.063 ± 0.063	--	1.188 ± 0.063 *	--	--	1.183 ± 0.130	1.000 ± 0.000	1.111 ± 0.080	1.007 ± 0.058	1.036 ± 0.036	1.000 ± 0.000	F563Y
F563A_L564A	0.000 ± 0.000 **	0.000 ± 0.000 **	0.125 ± 0.072 **	0.113 ± 0.066 **	0.000 ± 0.000 **	0.000 ± 0.000 **	0.000 ± 0.000 **	0.000 ± 0.000 **	0.467 ± 0.046 **	0.520 ± 0.056 **	0.622 ± 0.074 **	0.300 ± 0.049 **	0.579 ± 0.091 **	0.400 ± 0.082 **	F563A_L564A
F563A_L674A	0.000 ± 0.000 **	0.000 ± 0.000 **	0.125 ± 0.072 **	0.100 ± 0.058 **	0.000 ± 0.000 **	0.063 ± 0.063 **	0.000 ± 0.000 **	0.000 ± 0.000 **	0.523 ± 0.073 **	0.520 ± 0.056 **	0.822 ± 0.061 *	0.933 ± 0.041	0.836 ± 0.070 *	0.400 ± 0.082 **	F563A_L674A
L674A_D681A	0.207 ± 0.032 **	0.083 ± 0.083 **	0.233 ± 0.056 **	0.133 ± 0.033 **	0.267 ± 0.017 **	0.480 ± 0.077 **	0.142 ± 0.095 **	0.194 ± 0.080 **	1.000 ± 0.000	0.933 ± 0.067	1.000 ± 0.000	1.000 ± 0.000	1.000 ± 0.000	1.000 ± 0.000	L674A_D681A
L674A_N719A	0.207 ± 0.032 **	0.125 ± 0.080 **	0.183 ± 0.010 **	0.067 ± 0.041 **	0.050 ± 0.050 **	0.254 ± 0.038 **	0.050 ± 0.050 **	0.083 ± 0.057 **	0.967 ± 0.033	1.000 ± 0.105	1.000 ± 0.000	1.000 ± 0.000	1.000 ± 0.000	1.000 ± 0.000	L674A_N719A
L674A_M862A	0.240 ± 0.039 **	0.175 ± 0.069 **	0.233 ± 0.056 **	0.200 ± 0.062 **	0.483 ± 0.067 **	0.641 ± 0.063 **	0.350 ± 0.070 **	0.694 ± 0.080 **	1.000 ± 0.000	0.933 ± 0.067	1.000 ± 0.000	1.000 ± 0.000	1.000 ± 0.000	1.000 ± 0.000	L674A_M862A
D681A_M862A	0.793 ± 0.032 **	0.675 ± 0.055 **	0.600 ± 0.071 **	0.933 ± 0.067	--	1.122 ± 0.107	--	--	1.000 ± 0.000	1.100 ± 0.100	1.000 ± 0.000	1.000 ± 0.000	1.000 ± 0.000	1.000 ± 0.000	D681A_M862A
N719A_M862A	0.240 ± 0.039 **	0.175 ± 0.069 **	0.233 ± 0.056 **	0.233 ± 0.041 **	0.367 ± 0.057 **	0.504 ± 0.053 **	0.267 ± 0.090 **	0.111 ± 0.082 **	1.000 ± 0.000	1.000 ± 0.000	1.000 ± 0.000	1.000 ± 0.000	1.000 ± 0.000	1.000 ± 0.000	N719A_M862A
L674A_D681A_N719A	0.033 ± 0.033 **	0.042 ± 0.042 **	0.142 ± 0.048 **	0.000 ± 0.000 **	0.000 ± 0.000 **	0.000 ± 0.000 **	0.000 ± 0.000 **	0.056 ± 0.035 **	0.933 ± 0.041	1.000 ± 0.000	1.000 ± 0.000	1.000 ± 0.000	1.000 ± 0.000	0.700 ± 0.122 *	L674A_D681A_N719A
D681A_N719A_M862A	0.273 ± 0.037 **	0.175 ± 0.069 **	0.275 ± 0.055 **	0.233 ± 0.041 **	0.533 ± 0.086 **	0.707 ± 0.089 **	0.525 ± 0.025 **	0.361 ± 0.180 *	1.000 ± 0.000	1.167 ± 0.105	1.000 ± 0.000	1.000 ± 0.000	1.000 ± 0.000	1.000 ± 0.000	D681A_N719A_M862A

## Sheet: c, CH1-CH4 tunnels
Supplementary Data 1. Drug susceptibility profiles of AcrB substitution variants. a, TM7/TM8 groove, b, TM8/PC2 tunnel, c, CH1-CH4 tunnels. Data are mean ± s.e.m. of N = ≥3–4 biologically independent cells. * represents p value = 0.005–0.05 (Student's t-test, two-sided); ** represents p value < 0.005 (Student's t-test, two-sided). Growth of the cells: red, ≤0.6 (severely affected); light red, 0.6…
Control	Cloxacillin	Dicloxacillin	Oxacillin	Piperacillin	Fusidic acid	Erythromycin	Doxorubicin	Rhodamine 6G	TPP+	Control
WT (positive)	1.000 ± 0.000	1.000 ± 0.000	1.000 ± 0.000	1.000 ± 0.000	1.000 ± 0.000	1.000 ± 0.000	1.000 ± 0.000	1.000 ± 0.000	1.000 ± 0.000	WT (positive)
D407N (negative)	0.000 ± 0.000	0.002 ± 0.002	0.003 ± 0.003	0.005 ± 0.005	0.034 ± 0.009	0.031 ± 0.009	0.022 ± 0.009	0.008 ± 0.004	0.002 ± 0.002	D407N (negative)
CH1 + CH4	Cloxacillin	Dicloxacillin	Oxacillin	Piperacillin	Fusidic acid	Erythromycin	Doxorubicin	Rhodamine 6G	TPP+	CH1 + CH4 mutants
N298A	0.092 ± 0.053 **	0.333 ± 0.068 **	0.167 ± 0.000 **	0.133 ± 0.045 **	0.525 ± 0.072 **	0.908 ± 0.053	1.000 ± 0.000	0.375 ± 0.042 **	1.000 ± 0.000	N298A
F563A	0.383 ± 0.017 **	0.521 ± 0.086 **	0.667 ± 0.000 **	0.567 ± 0.079 **	0.617 ± 0.073 **	0.867 ± 0.082	1.000 ± 0.000	1.000 ± 0.000	1.000 ± 0.000	F563A
N298A-F563A	0.000 ± 0.000 **	0.000 ± 0.000 **	0.000 ± 0.000 **	0.000 ± 0.000 **	0.000 ± 0.000 **	0.000 ± 0.000 **	0.042 ± 0.042 **	0.000 ± 0.000 **	0.000 ± 0.000 **	N298A-F563A
V340A	0.292 ± 0.125 **	0.258 ± 0.044 **	0.208 ± 0.042 **	0.208 ± 0.042 **	0.721 ± 0.033 **	0.867 ± 0.097	1.000 ± 0.000	1.000 ± 0.000	0.900 ± 0.067	V340A
F380A	0.417 ± 0.144 *	0.517 ± 0.088 **	0.417 ± 0.048 **	0.417 ± 0.083 **	0.825 ± 0.069	1.000 ± 0.000	1.000 ± 0.000	1.000 ± 0.000	0.967 ± 0.033	F380A
V340A-F563A	0.000 ± 0.000 **	0.000 ± 0.000 **	0.000 ± 0.000 **	0.000 ± 0.000 **	0.392 ± 0.039 **	0.333 ± 0.118 **	1.000 ± 0.000	1.000 ± 0.000	0.300 ± 0.082 **	V340A-F563A
F380A-Y545A	0.125 ± 0.042 **	0.042 ± 0.042 **	0.125 ± 0.042 **	0.167 ± 0.000 **	0.392 ± 0.039 **	0.767 ± 0.067 *	0.958 ± 0.042	0.583 ± 0.048 **	0.900 ± 0.067	F380A-Y545A
F380A-F563A	0.042 ± 0.042 **	0.000 ± 0.000 **	0.000 ± 0.000 **	0.000 ± 0.000 **	0.392 ± 0.039 **	0.533 ± 0.133 *	1.000 ± 0.000	0.958 ± 0.042	0.367 ± 0.097 **	F380A-F563A
