# Supplementary material for: Allosteric drug transport mechanism of multidrug transporter AcrB
Source: Nat Commun. 2021 Jun 29;12:3889. doi: 10.1038/s41467-021-24151-3 (PMC8242077; doi:10.1038/s41467-021-24151-3)
Supplement: Supplementary file 5 — Supplementary Data 2 [file 41467_2021_24151_MOESM5_ESM.xlsx]

## Sheet: a, ansamycins
Supplementary Data 2. Drug susceptibility profiles of AcrB substitution variants. a, ansamycins, b, macrolides, c, TMD-BP pathway. Data are mean ± s.e.m. of N = ≥3–4 biologically independent cells. * represents p value = 0.005–0.05 (Student's t-test, two-sided); ** represents p value < 0.005 (Student's t-test, two-sided). Growth of the cells: red, ≤0.6 (severely affected); light red, 0.6–0.8 (aff…
Control	3-formyrifamycin SV	Rifamycin SV	Rifabutin	Rifaximin
WT (positive)	1.000 ± 0.000	1.000 ± 0.000	1.000 ± 0.000	1.000 ± 0.000	WT (positive)
D407N (negative)	0.138 ± 0.035	0.021 ± 0.015	0.007 ± 0.007	0.016 ± 0.011	D407N (negative)
Single mutants	3-formyrifamycin SV	Rifamycin SV	Rifabutin	Rifaximin
F136A	0.063 ± 0.063 **	0.171 ± 0.073 **	0.386 ± 0.073 **	0.131 ± 0.051 **	F136A
M573A	1.008 ± 0.075	0.929 ± 0.066	0.869 ± 0.061	0.964 ± 0.036	M573A
M575A	0.867 ± 0.082	0.690 ± 0.072 **	0.442 ± 0.060 **	0.750 ± 0.115	M575A
Q577A	0.976 ± 0.092	1.222 ± 0.080 *	1.042 ± 0.100	1.333 ± 0.094 *	Q577A
F615A	0.125 ± 0.125 **	0.071 ± 0.050 **	0.178 ± 0.068 **	0.369 ± 0.060 **	F615A
F617A	0.083 ± 0.055 **	0.711 ± 0.070 **	0.569 ± 0.045 **	0.556 ± 0.080 **	F617A
R620A	1.476 ± 0.138 **	1.222 ± 0.080 *	2.000 ± 0.224 **	1.417 ± 0.094 **	R620A
M662A	1.214 ± 0.079 *	1.131 ± 0.061	0.653 ± 0.082 **	0.944 ± 0.056	M662A
F664A	0.817 ± 0.069 *	0.838 ± 0.063 *	0.694 ± 0.100 *	0.774 ± 0.067 *	F664A
F666A	0.979 ± 0.145	0.790 ± 0.083 *	0.447 ± 0.068 **	0.536 ± 0.106 **	F666A
L668A	1.429 ± 0.114 **	1.353 ± 0.061 *	1.000 ± 0.000	1.556 ± 0.102 **	L668A
V672A	1.345 ± 0.107 *	1.236 ± 0.100 *	1.361 ± 0.117 *	1.486 ± 0.111 **	V672A
L674A	1.643 ± 0.067 **	1.311 ± 0.096 *	1.389 ± 0.139 *	1.292 ± 0.109 *	L674A
T676A	0.345 ± 0.129 **	1.097 ± 0.111	0.694 ± 0.077 **	0.472 ± 0.051 **	T676A
D681A	0.893 ± 0.069	0.931 ± 0.045	0.533 ± 0.082 **	0.627 ± 0.055 **	D681A
S715A	1.000 ± 0.105	1.083 ± 0.083	0.733 ± 0.067 **	0.903 ± 0.120	S715A
R717A	0.653 ± 0.013 **	0.897 ± 0.047	1.933 ± 0.067 **	1.220 ± 0.080 *	R717A
N719A	0.973 ± 0.086	1.194 ± 0.125	1.000 ± 0.000	1.020 ± 0.128	N719A
R815A	0.907 ± 0.105	0.739 ± 0.057 **	1.333 ± 0.183	0.717 ± 0.049 **	R815A
E826A	0.347 ± 0.106 **	0.739 ± 0.057 **	0.400 ± 0.067 **	0.553 ± 0.047 **	E826A
L828A	1.173 ± 0.129	1.450 ± 0.138 *	2.000 ± 0.000 **	1.220 ± 0.080 *	L828A
Q830A	0.907 ± 0.105	0.967 ± 0.033	0.733 ± 0.125	0.880 ± 0.080	Q830A
G614P	0.000 ± 0.000 **	0.000 ± 0.000 **	0.100 ± 0.072 **	0.040 ± 0.040 **	G614P
G616P	0.367 ± 0.085 **	0.333 ± 0.046 **	0.317 ± 0.070 **	0.080 ± 0.080 **	G616P
G619P	1.040 ± 0.053	1.000 ± 0.000	0.952 ± 0.065	0.580 ± 0.058 **	G619P
G621P	0.462 ± 0.045 **	0.933 ± 0.041	0.952 ± 0.065	0.473 ± 0.102 **	G621P
G619P-G621P	0.657 ± 0.082 **	0.217 ± 0.062 **	0.000 ± 0.000 **	0.080 ± 0.080 **	G619P-G621P

## Sheet: b, macrolides
Supplementary Data 2. Drug susceptibility profiles of AcrB substitution variants. a, ansamycins, b, macrolides, c, TMD-BP pathway. Data are mean ± s.e.m. of N = ≥3–4 biologically independent cells. * represents p value = 0.005–0.05 (Student's t-test, two-sided); ** represents p value < 0.005 (Student's t-test, two-sided). Growth of the cells: red, ≤0.6 (severely affected); light red, 0.6–0.8 (aff…
Control	Clarithromycin	Dirithromycin	Erythromycin	Oleandomycin	Roxithromycin	Spiramycin	Tylosin
WT (positive)	1.000 ± 0.000	1.000 ± 0.000	1.000 ± 0.000	1.000 ± 0.000	1.000 ± 0.000	1.000 ± 0.000	1.000 ± 0.000	WT
D407N (negative)	0.025 ± 0.017	0.000 ± 0.000	0.020 ± 0.014	0.028 ± 0.015	0.019 ± 0.019	0.053 ± 0.022	0.032 ± 0.022	D407N
Single mutants	Clarithromycin	Dirithromycin	Erythromycin	Oleandomycin	Roxithromycin	Spiramycin	Tylosin
Q89A	1.007 ± 0.074	1.028 ± 0.067	0.988 ± 0.053	0.917 ± 0.057	0.967 ± 0.033	0.813 ± 0.083	0.964 ± 0.065	Q89A
S134A	1.255 ± 0.079 *	1.083 ± 0.083	1.107 ± 0.074	1.033 ± 0.033	0.967 ± 0.033	0.987 ± 0.116	0.964 ± 0.036	S134A
S135A	0.567 ± 0.067 **	0.513 ± 0.125 **	0.617 ± 0.081 **	0.407 ± 0.027 **	0.380 ± 0.133 **	0.900 ± 0.061	0.900 ± 0.067	S135A
F136A	0.538 ± 0.111 **	0.667 ± 0.129 *	0.369 ± 0.072 **	0.678 ± 0.065 **	0.787 ± 0.103	0.947 ± 0.122	0.845 ± 0.056 *	F136A
K292A	1.136 ± 0.103	1.333 ± 0.211	1.012 ± 0.046	1.367 ± 0.203	1.073 ± 0.087	1.580 ± 0.180 *	1.214 ± 0.085 *	K292A
M573A	1.152 ± 0.098	0.889 ± 0.056	1.000 ± 0.055	0.850 ± 0.074	1.040 ± 0.113	1.013 ± 0.179	1.405 ± 0.046 **	M573A
M575A	0.619 ± 0.117 *	0.472 ± 0.051 **	0.548 ± 0.060 **	0.283 ± 0.069 **	0.413 ± 0.112 **	0.593 ± 0.113 *	0.929 ± 0.046	M575A
F615A	0.300 ± 0.068 **	0.556 ± 0.035 **	0.214 ± 0.025 **	0.200 ± 0.080 **	0.133 ± 0.062 **	0.723 ± 0.074 *	0.964 ± 0.036	F615A
F617A	1.225 ± 0.103	0.708 ± 0.042 **	1.125 ± 0.125	1.007 ± 0.058	1.217 ± 0.157	0.804 ± 0.071	0.938 ± 0.063	F617A
I626A	1.083 ± 0.083	1.008 ± 0.075	1.217 ± 0.142	1.000 ± 0.000	1.438 ± 0.092 **	0.792 ± 0.042 **	0.838 ± 0.099	I626A
F666A	0.042 ± 0.042 **	0.175 ± 0.008 **	0.042 ± 0.042 **	0.000 ± 0.000	0.000 ± 0.000 **	0.208 ± 0.042 **	0.392 ± 0.039 **	F666A
V672A	1.300 ± 0.238	1.050 ± 0.050	1.425 ± 0.217	1.175 ± 0.118	1.438 ± 0.092 **	1.083 ± 0.083	0.754 ± 0.088 *	V672A
E673A	0.783 ± 0.040 **	0.342 ± 0.114 **	0.629 ± 0.053 **	0.342 ± 0.061 **	0.938 ± 0.063	0.542 ± 0.042 **	0.838 ± 0.099	E673A
T676A	0.783 ± 0.040 **	0.917 ± 0.083	0.433 ± 0.041 **	0.808 ± 0.142	0.063 ± 0.063 **	0.917 ± 0.048	0.983 ± 0.150	T676A
D681A	0.383 ± 0.117 **	0.160 ± 0.040 **	0.340 ± 0.108 **	0.300 ± 0.089 **	0.133 ± 0.062 **	0.543 ± 0.092 **	0.817 ± 0.076 *	D681A
E683A	1.050 ± 0.050	1.050 ± 0.050	1.258 ± 0.220	1.025 ± 0.184	1.208 ± 0.072 *	1.000 ± 0.000	0.879 ± 0.151	E683A
E826A	0.175 ± 0.069 **	0.300 ± 0.122 **	0.154 ± 0.054 **	0.146 ± 0.052 **	0.063 ± 0.063 **	0.250 ± 0.048 **	0.342 ± 0.061 **	E826A
M862A	1.217 ± 0.157	1.050 ± 0.050	1.425 ± 0.217	1.175 ± 0.118	1.667 ± 0.118 **	1.167 ± 0.167	1.046 ± 0.165	M862A
G614P	0.042 ± 0.042 **	0.042 ± 0.042 **	0.067 ± 0.041 **	0.167 ± 0.000 **	0.083 ± 0.083 **	0.200 ± 0.033 **	0.173 ± 0.075 **	G614P
G616P	0.042 ± 0.042 **	0.083 ± 0.048 **	0.067 ± 0.041 **	0.167 ± 0.000 **	0.125 ± 0.080 **	0.200 ± 0.033 **	0.207 ± 0.062 **	G616P
G619P	0.083 ± 0.048 **	0.208 ± 0.042 **	0.500 ± 0.118 **	0.389 ± 0.056 **	0.500 ± 0.068 **	0.633 ± 0.062 **	0.413 ± 0.083 **	G619P
G621P	1.063 ± 0.063	0.958 ± 0.042	0.967 ± 0.033	1.000 ± 0.000	1.000 ± 0.000	1.000 ± 0.000	0.860 ± 0.036 **	G621P
G619P-G621P	0.083 ± 0.083 **	0.125 ± 0.080 **	0.133 ± 0.062 **	0.167 ± 0.000	0.125 ± 0.080 **	0.100 ± 0.067 **	0.133 ± 0.082 **	G619P-G621P

## Sheet: c, TMD-BP pathway
Supplementary Data 2. Drug susceptibility profiles of AcrB substitution variants. a, ansamycins, b, macrolides, c, TMD-BP pathway. Data are mean ± s.e.m. of N = ≥3–4 biologically independent cells. * represents p value = 0.005–0.05 (Student's t-test, two-sided); ** represents p value < 0.005 (Student's t-test, two-sided). Growth of the cells: red, ≤0.6 (severely affected); light red, 0.6–0.8 (aff…
Control	Chloramphenicol	Florfenicol	Thiamphenicol	Linezolid	Dicloxacillin	Oxacillin	Fusidic acid	Novobiocin	Erythromycin	Doxorubicin	Rhodamine 6G	TPP+	Control
WT (positive)	1.000 ± 0.000	1.000 ± 0.000	1.000 ± 0.000	1.000 ± 0.000	1.000 ± 0.000	1.000 ± 0.000	1.000 ± 0.000	1.000 ± 0.000	1.000 ± 0.000	1.000 ± 0.000	1.000 ± 0.000	1.000 ± 0.000	WT (positive)
D407N (negative)	0.054 ± 0.014	0.048 ± 0.010	0.094 ± 0.018	0.019 ± 0.007	0.002 ± 0.002	0.003 ± 0.003	0.034 ± 0.009	0.032 ± 0.010	0.031 ± 0.009	0.022 ± 0.009	0.008 ± 0.004	0.002 ± 0.002	D407N (negative)
TMD-BP	Chloramphenicol	Florfenicol	Thiamphenicol	Linezolid	Dicloxacillin	Oxacillin	Fusidic acid	Novobiocin	Erythromycin	Doxorubicin	Rhodamine 6G	TPP+	TMD-BP variants
E339A	1.007 ± 0.058	1.083 ± 0.083	1.000 ± 0.063	0.978 ± 0.056	1.060 ± 0.065	0.972 ± 0.028	1.000 ± 0.000	0.950 ± 0.050	1.060 ± 0.065	1.000 ± 0.000	0.976 ± 0.024	0.967 ± 0.033	E339A
T343A	1.000 ± 0.000	1.100 ± 0.100	1.000 ± 0.000	0.967 ± 0.033	0.920 ± 0.102	1.000 ± 0.000	0.800 ± 0.097	1.000 ± 0.000	1.000 ± 0.000	1.000 ± 0.000	1.000 ± 0.000	1.000 ± 0.000	T343A
E346A	0.540 ± 0.086 **	0.419 ± 0.055 **	0.571 ± 0.050 **	0.550 ± 0.090 **	0.364 ± 0.030 **	0.500 ± 0.114 **	0.717 ± 0.049 **	0.653 ± 0.054 **	0.714 ± 0.113 *	1.000 ± 0.000	0.976 ± 0.024	0.933 ± 0.041	E346A
L350A	0.400 ± 0.074 **	0.322 ± 0.061 **	0.381 ± 0.048 **	0.522 ± 0.097 **	0.671 ± 0.023 **	0.500 ± 0.105 **	1.000 ± 0.000	0.770 ± 0.070 *	1.036 ± 0.081	1.000 ± 0.000	1.000 ± 0.000	1.000 ± 0.000	L350A
F396A	1.000 ± 0.063	1.117 ± 0.083	1.000 ± 0.073	0.978 ± 0.070	0.790 ± 0.063 *	0.889 ± 0.056	0.958 ± 0.042	0.877 ± 0.052 *	0.917 ± 0.079	1.000 ± 0.000	0.952 ± 0.048	0.967 ± 0.033	F396A
V399A	1.075 ± 0.048	1.067 ± 0.042	1.408 ± 0.120 *	1.000 ± 0.000	0.917 ± 0.077	0.875 ± 0.080	0.893 ± 0.069	0.917 ± 0.083	0.944 ± 0.035	1.000 ± 0.000	1.000 ± 0.000	1.000 ± 0.000	V399A
L400A	0.142 ± 0.069 **	0.178 ± 0.044 **	0.214 ± 0.051 **	0.067 ± 0.041 **	0.048 ± 0.031 **	0.000 ± 0.000 **	0.467 ± 0.046 **	0.661 ± 0.049 **	0.478 ± 0.108 **	1.000 ± 0.000	1.000 ± 0.000	0.208 ± 0.042 **	L400A
L404A	0.883 ± 0.057	0.939 ± 0.039	0.850 ± 0.074	0.933 ± 0.041	0.781 ± 0.067 *	0.692 ± 0.108 *	0.843 ± 0.067	0.817 ± 0.075	0.972 ± 0.028	1.000 ± 0.000	1.000 ± 0.000	1.000 ± 0.000	L404A
L449A	1.108 ± 0.049	1.033 ± 0.033	1.561 ± 0.168 *	1.000 ± 0.000	0.717 ± 0.080 **	--	0.803 ± 0.084 *	0.892 ± 0.049	0.917 ± 0.057	1.000 ± 0.000	1.000 ± 0.000	1.000 ± 0.000	L449A
L921A	0.960 ± 0.040	1.000 ± 0.000	1.000 ± 0.000	1.000 ± 0.000	1.056 ± 0.056	1.050 ± 0.050	1.067 ± 0.067	0.900 ± 0.068	1.000 ± 0.000	1.000 ± 0.000	1.000 ± 0.000	1.000 ± 0.000	L921A
T934A	0.680 ± 0.062 **	0.578 ± 0.052 **	0.714 ± 0.079 **	0.778 ± 0.070 *	0.171 ± 0.048 **	0.361 ± 0.067 **	0.419 ± 0.055 **	0.587 ± 0.037 **	0.464 ± 0.150 **	1.000 ± 0.000	1.000 ± 0.000	1.000 ± 0.000	T934A
L937A	1.000 ± 0.063	0.839 ± 0.088	0.905 ± 0.071	0.778 ± 0.082 *	0.088 ± 0.043 **	0.250 ± 0.057 **	0.419 ± 0.055 **	0.513 ± 0.043 **	0.488 ± 0.153 *	0.867 ± 0.097	0.714 ± 0.107 *	0.667 ± 0.075 **	L937A
cl_A981C	0.927 ± 0.045	0.972 ± 0.028	0.905 ± 0.071	0.978 ± 0.070	1.186 ± 0.120	0.972 ± 0.028	1.056 ± 0.056	0.917 ± 0.053	1.143 ± 0.117	1.000 ± 0.000	0.976 ± 0.024	0.967 ± 0.033	cl_A981C
F982A	0.933 ± 0.092	0.908 ± 0.080	0.857 ± 0.099	0.950 ± 0.074	0.824 ± 0.049 **	0.972 ± 0.028	1.047 ± 0.082	0.917 ± 0.053	1.214 ± 0.149	1.000 ± 0.000	1.000 ± 0.000	1.000 ± 0.000	F982A
L989A	0.931 ± 0.102	0.933 ± 0.041	0.800 ± 0.079 *	0.967 ± 0.033	1.000 ± 0.000	0.917 ± 0.083	0.972 ± 0.028	1.010 ± 0.071	1.075 ± 0.048	1.000 ± 0.000	1.000 ± 0.000	1.000 ± 0.000	L989A
V1003A	1.194 ± 0.125	1.040 ± 0.040	1.000 ± 0.000	1.006 ± 0.047	0.967 ± 0.033	0.917 ± 0.083	0.972 ± 0.028	0.887 ± 0.079	0.950 ± 0.096	1.000 ± 0.000	1.029 ± 0.029	1.000 ± 0.000	V1003A
