# Supplementary material for: Allosteric drug transport mechanism of multidrug transporter AcrB
Source: Nat Commun. 2021 Jun 29;12:3889. doi: 10.1038/s41467-021-24151-3 (PMC8242077; doi:10.1038/s41467-021-24151-3)
Supplement: Supplementary file 6 — Supplementary Data 3 [file 41467_2021_24151_MOESM6_ESM.xlsx]

## Sheet: Sheet1
Supplementary Data Table 3. Data collection and refinement statistics.
	AcrB-Gly619Pro_Gly621Pro + FUA in TM1/TM2	AcrB-Gly619Pro_Gly621Pro + 3-FOR in AP of L and T	AcrB-Gly619Pro + MIN in DBP of T	AcrB-Gly619Pro + 3-FOR in AP of L and T	AcrB-Gly621Pro + MIN in DBP of T	AcrB-Gly621Pro + RFB in AP of T	AcrB L2, partially induced T + DDM in PC2/TM8 tunnel	AcrB + 3-FOR in AP of L	AcrB-Gly616Pro + 3-FOR in AP of T + ERY in AP of T + before STARANISO truncation	AcrB-Gly616Pro + 3-FOR in AP of T + ERY in AP of T + after STARANISO truncated data	AcrB fully induced T + FUA in TM1/TM2, TM7/TM8, TMD-BP of fully induced T	AcrB-Phe563Ala TTT	AcrB-Phe380Ala + FUA in TM7/TM8 of T	AcrB-Ile38Phe_Ile671Thr + MIN in DBP of T
Data collection
Beamline	PX1, SOLEIL Synchrotron	PX2A, SOLEIL Synchrotron	PX1, SOLEIL Synchrotron	PX2A, SOLEIL Synchrotron	PX2A, SOLEIL Synchrotron	PX1, SOLEIL Synchrotron	PX1, SOLEIL Synchrotron	PX1, SOLEIL Synchrotron	PX1, SOLEIL Synchrotron	PX1, SOLEIL Synchrotron	X06DA, SLS	PX1, SOLEIL Synchrotron	PX1, SOLEIL Synchrotron	P13, DESY
PDB accession	6ZO5	6ZOH	6ZO6	6ZO7	6ZO8	6ZO9	6ZOA	6ZOB		6ZOC	6ZOD	6ZOE	6ZOF	6ZOG
Space group:	P212121	P212121	P212121	P212121	P212121	P212121	P212121	P212121	P212121	P212121	P212121	I23	P212121	P212121
Cell constants a, b, c (Å) α, β, γ (°)	146.23, 159.70, 245.49 90.0, 90.0, 90.0	145.14, 160.13, 243.59 90.0, 90.0, 90.0	146.28, 161.01, 245.46 90.0, 90.0, 90.0	144.73, 157.68, 244.04 90.0, 90.0, 90.0	146.41, 161.62, 245.04 90.0, 90.0, 90.0	147.16, 160.52, 244.08 90.0, 90.0, 90.0	145.60, 162.99, 246.38 90.0, 90.0, 90.0	145.36, 160.20, 244.34 90.0, 90.0, 90.0	145.33, 161.26, 244.04 90.0, 90.0, 90.0	145.33, 161.26, 244.03 90.0, 90.0, 90.0	145.99, 166.13, 243.68 90.0, 90.0, 90.0	226.61, 226.61, 226.61 90.0, 90.0, 90.0	145.10, 162.33, 244.85 90.0, 90.0, 90.0	145.96, 161.95, 245.29 90.0, 90.0, 90.0
Resolution	49.38– 2.50 (2.54-2.50)	49.19– 2.80 (2.85-2.80)	49.36– 2.35 (2.39-2.35)	48.86– 2.85 (2.90-2.85)	48.87– 2.50 (2.54-2.50)	49.05– 2.70 (2.75-2.70)	49.68–3.05 (3.10–3.05)	49.15–2.80 (2.85–2.80)	49.43–2.89 (2.94–2.89)	49.37–2.89 (3.19–2.89)	49.12–2.85 (2.90–2.85)	46.26–2.85 (2.95–2.85)	49.65– 3.30 (3.36-3.30)	49.59–2.75 (2.80–2.75)
Unique reflections	198321 (9733)	139909 (6887)	240294 (11808)	130632 (6399)	200541 (9829)	158692 (7775)	111779 (5449)	140616 (6882)	129623 (6332)	88609 (4402)	134919 (6748)	45123 (4391)	87562 (4410)	151127 (7413)
Completeness overall (%)	100.0 (100.0)	100.0 (100.0)	100.0 (99.9)	100.0 (100.0)	100.0 (100.0)	100.0 (99.9)	99.8 (99.9)	100.0 (100.0)	100.0 (100.0)	95.5 (73.7)	97.7 (99.2)	100.0 (100.0)	100.0 (100.0)	100.0 (100.0)
Multiplicity (%)	6.7 (6.8)	6.3 (6.3)	5.4 (5.5)	7.8 (7.9)	7.0 (7.0)	7.7 (7.9)	5.5 (5.3)	9.1 (9.3)	9.1 (9.0)	8.4 (8.5)	4.7 (4.6)	105.7 (106.0)	7.0 (7.0)	7.6 (7.7)
<I>/<σ(I)>	9.6 (1.0)	7.6 (1.0)	8.6 (1.0)	7.0 (0.9)	8.9 (1.0)	6.9 (1.1)	5.8 (1.0)	9.0 (1.2)	4.6 (0.5)	6.9 (1.5)	8.1 (1.2)	28.8 (4.3)	5.4 (1.3)	9.8 (1.2)
Rmeas	0.188 (2.246)	0.227 (2.300)	0.181 (2.177)	0.319 (2.300)	0.179 (2.469)	0.252 (2.277)	0.319 (2.488)	0.245 (2.200)	0.640 (6.757)	0.365 (1.578)	0.157 (1.991)	0.196 (2.031)	0.453 (2.112)	0.205 (2.219)
Rmerge	0.173 (2.075)	0.208 (2.110)	0.163 (1.968)	0.297 (2.146)	0.166 (2.287)	0.236 (2.132)	0.289 (2.249)	0.232 (2.080)	0.604 (6.374)	0.343 (1.480)	0.141 (1.778)	0.195 (2.022)	0.419 (1.955)	0.191 (2.068)
Rpim	0.072 (0.856)	0.090 (0.907)	0.077 (0.923)	0.114 (0.823)	0.067 (0.926)	0.089 (0.793)	0.133 (1.050)	0.080 (0.712)	0.210 (2.225)	0.124 (0.540)	0.069 (0.877)	0.019 (0.197)	0.170 (0.793)	0.074 (0.797)
CC(1/2)	0.972 (0.405)	0.992 (0.373)	0.994 (0.408)	0.971 (0.552)	0.996 (0.347)	0.996 (0.408)	0.966 (0.344)	0.995 (0.506)	0.990 (0.406)	0.987 (0.545)	0.996 (0.518)	1.000 (0.953)	0.972 (0.496)	0.990 (0.496)
Refinement
No. of reflections	188276	133053	228104	124128	190491	150834	106083	133625	--	88443	128056	42780	83111	143539
Rwork / Rfree	0.2261 / 0.2523	0.2230 / 0.2452	0.2311 / 0.2572	0.2381 / 0.2708	0.2191 / 0.2488	0.2412 / 0.2735	0.2402 / 0.2715	0.2376 / 0.2623	--	0.2184 / 0.2381	0.2048 / 0.2474	0.2227 / 0.2654	0.2357 / 0.2575	0.2303 / 0.2682
No. atoms
Protein / Ligand + ion / Water	25964 / 787 / 869	25922 / 619 / 244	26069 / 882 / 1188	25914 / 681 / 298	26017 / 922 / 417	26053 / 661 / 231	25942 / 554 / 275	25915 / 371 / 153	--	25903 / 800 / 191	25775 / 782 / 156	9095 / 73 / 56	25970 / 318 / 20	25975 / 491 / 133
B-factors
Protein / Ligand + ion / Water	48.98 / 69.48 / 37.89	63.91 / 94.01 / 39.50	47.34 / 67.62 / 43.36	55.72 / 83.84 / 30.49	54.36 / 88.69 / 41.85	59.29 / 87.32 / 36.65	63.35 / 82.14 / 31.72	63.91 / 78.60 / 38.96	--	37.76 / 57.54 / 6.61	77.23 / 118.33 / 60.48	80.99 / 94.31 / 53.18	60.77 / 85.36 / 11.91	66.29 / 93.81 / 39.98
r.m.s. deviations from ideal values
Bond length (Å)	0.0017	0.002	0.0016	0.002	0.002	0.0015	0.0016	0.0017	--	0.0053	0.0049	0.0018	0.0016	0.0016
Bond angles (º)	1.1687	1.1742	1.1701	1.1735	1.1716	1.1497	1.1748	1.1801	--	0.54	0.82	1.174	1.1663	1.1711
Φ, Ψ angle distribution for residues
In allowed regions / In disallowed regions (%)	99.9 / 0.1	99.9 / 0.1	99.9 / 0.1	99.9 / 0.1	99.9 / 0.1	99.9 / 0.1	99.8 / 0.2	99.9 / 0.1	--	99.9 / 0.1	99.8 / 0.2	99.8 / 0.2	99.9 / 0.1	99.9 / 0.1
